# Supplementary material
Source: PubMed Central journal article supplement (PMC2644900)
Supplement: NIHMS86691-supplement-1_si_001.pdf [file NIHMS86691-supplement-1_si_001.pdf]

## Supplemental Figure 1

| Parseghian (1994) <sup>1</sup> | Doenecke (1989 - 1997) <sup>2</sup> | Seyedin & Kistler (1979) <sup>3</sup> |
|--------------------------------|-------------------------------------|---------------------------------------|
| H1 <sup>o</sup>                | H1 <sup>o</sup>                     | H1 <sup>o</sup>                       |
| H1a                            | H1.1                                | H1a                                   |
| H1 <sup>s</sup> -1             | H1.2                                | H1c                                   |
| H1 <sup>s</sup> -2             | H1.3                                | H1d                                   |
| H1 <sup>s</sup> -3             | H1.5                                | H1b                                   |
| H1 <sup>s</sup> -4             | H1.4                                | H1e                                   |

### *Reference 1*

Parseghian, M.H., Henschen, A.H., Krieglstein, K.G., and Hamkalo, B.A. (1994) *Protein Sci.* **3**, 575-587.

### *Reference 2*

Albig, W., Meergans, T., and Doenecke, D. (1997) *Gene* **184**, 141-148.

### *Reference 3*

Seyedin, S.M., and Kistler, W.S. (1979) *Biochemistry* **18**, 1371-1375.
